# Supplementary material
Source: PubMed Central journal article supplement (PMC162247)
Supplement: nar_31_12_3027__1.pdf [file nar_31_12_3027__1.pdf]

## SUPPLEMENTARY MATERIAL

Table S1. DNA *in vitro* selection against D-SEB-peptide. After incubation of the D-peptide derivatized NeutrAvidin agarose with the indicated DNA amounts the matrix was washed with several column volumes of selection buffer until the final washing volume contained less than 0.5 % of the initially added DNA amount.

| <b>round</b> | <b>DNA<br/>[<math>\mu</math>M]</b> | <b>D-peptide conc.<br/>[<math>\mu</math>M]</b> | <b>reaction vol.<br/>[<math>\mu</math>l]</b> | <b>DNA bound on column after<br/>final washing [%]</b> |
|--------------|------------------------------------|------------------------------------------------|----------------------------------------------|--------------------------------------------------------|
| 1            | 5.9                                | 11.8                                           | 85                                           | 1.0                                                    |
| 2            | 1.4                                | 2.8                                            | 360                                          | 0.2                                                    |
| 3            | 1.4                                | 2.8                                            | 180                                          | 1.2                                                    |
| 4            | 1.4                                | 2.8                                            | 180                                          | 0.9                                                    |
| 5            | 1.4                                | 2.8                                            | 180                                          | 3.2                                                    |
| 6            | 1.4                                | 2.8                                            | 143                                          | 4.0                                                    |
| 7            | 0.35                               | 0.7                                            | 572                                          | 0.8                                                    |
| 8            | 0.35                               | 0.7                                            | 572                                          | 1.1                                                    |
| 9            | 0.35                               | 0.7                                            | 572                                          | 1.6                                                    |
| 10           | 0.35                               | 0.7                                            | 429                                          | 4.8                                                    |
| 11           | 0.35                               | 0.7                                            | 286                                          | 4.7                                                    |
| 12           | 0.35                               | 0.7                                            | 286                                          | 9.3                                                    |
